# Supplementary material for: Immune Signature of Patients With Cardiovascular Disease Predicts Increased Risk for a Severe Course of COVID-19
Source: Preprints.org preprint supplement (doi:10.20944/preprints202311.1289.v1), 2023-11-21
Supplement: Supplementary file 8 [file supplementary]

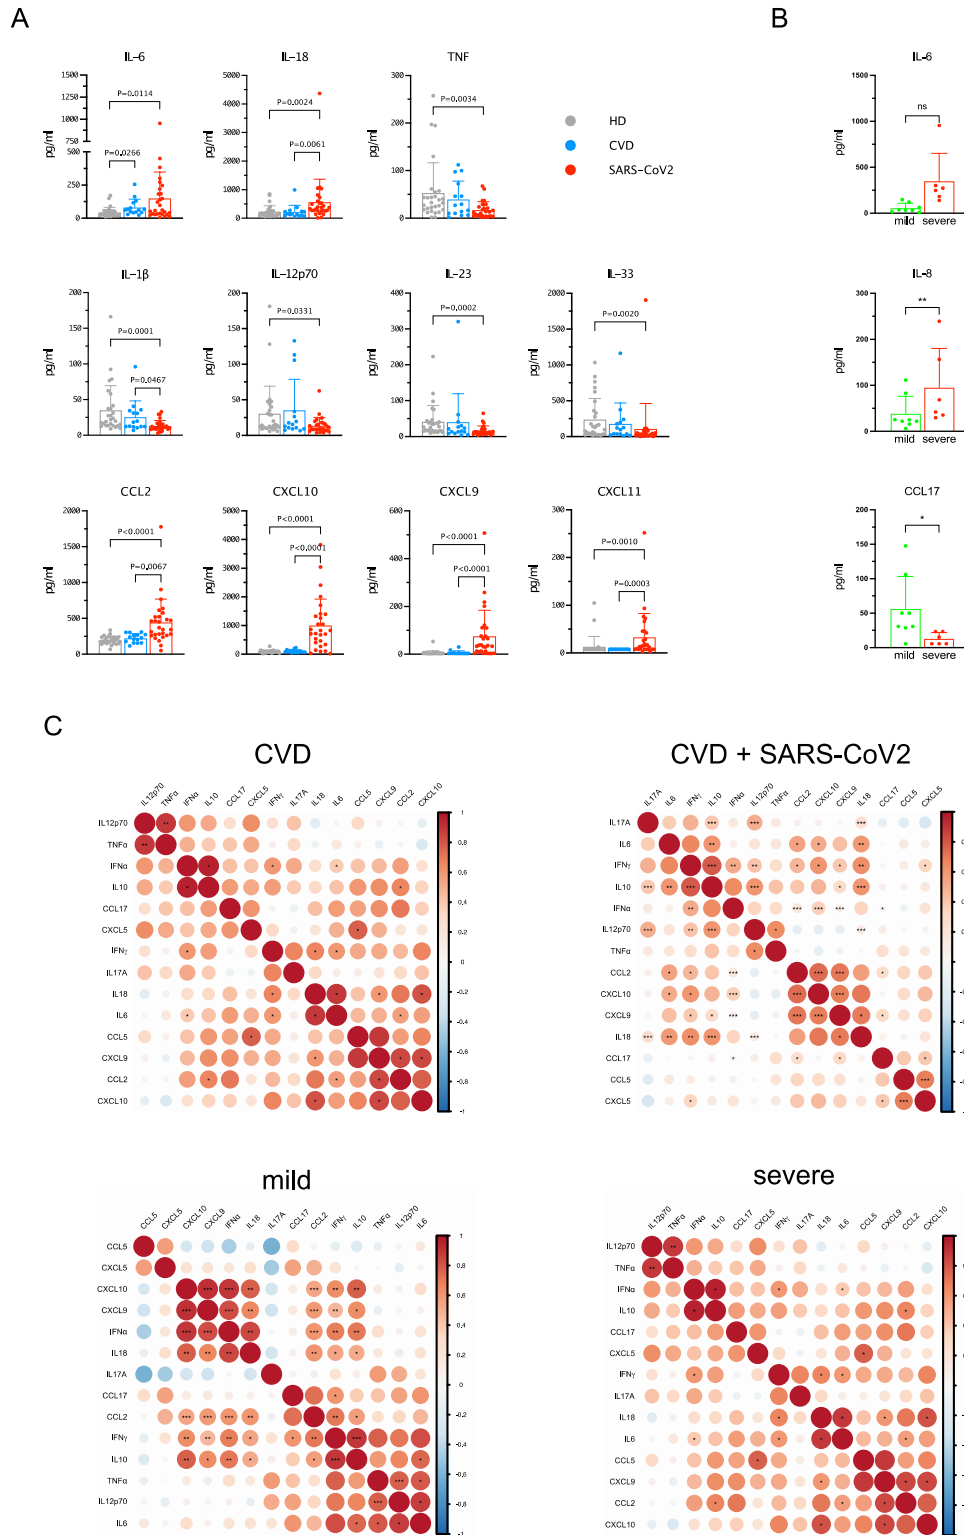

### Supplemental Figure 8: Cytokine expression in the plasma

Box plots show depicted cytokine levels in the plasma from HD (28), CVD patients (15) and SARS-CoV-2-infected CVD patients (28) **(A)** or mild (10) and severe (7) SARS-CoV-2-infected CVD patients **(B)**. **(C)** Clustered correlation analysis of the plasma cytokines/chemokines levels in the depicted patient cohorts. The size of the circle reflects the correlation coefficient either negative (blue) or positive (red). Data were analyzed using Kruskal-Wallis non-parametric test with Dunn's post-test **(A)** or nonparametric Mann-Whitney test with false discovery rate **(B)** or Spearman correlation coefficient **(C)**. Significant P values are depicted above the lines (\* > 0.05; \*\* > 0.01; \*\*\* > 0.001; \*\*\*\* > 0.0001).
