# Supplementary material for: Immune Signature of Patients With Cardiovascular Disease Predicts Increased Risk for a Severe Course of COVID-19
Source: Preprints.org preprint supplement (doi:10.20944/preprints202311.1289.v1), 2023-11-21
Supplement: Supplementary file 9 [file supplementary]

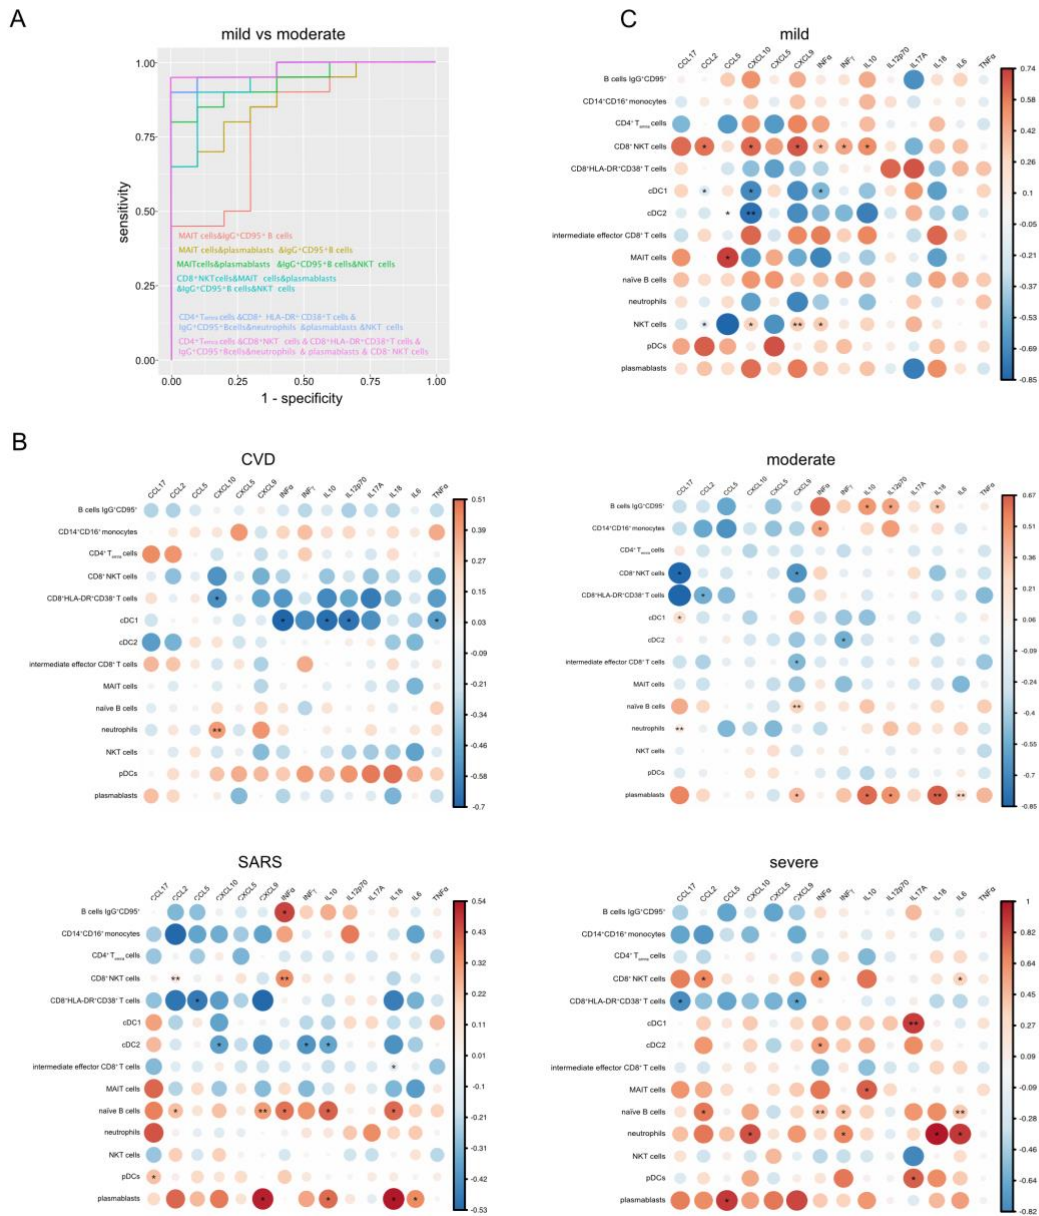

**Supplemental Figure 11: Combined analysis of cell populations and cytokines/chemokines**

(A) CombiROC analysis of cell populations in mild vs moderately SARS-CoV-2-infected CVD patients. Correlation analysis of plasma cytokines/chemokines levels and the depicted cell populations in CVD patients and SARS-CoV-2-infected CVD patients (B) mild, moderate, and severely SARS-CoV-2-infected CVD patients (C). The size of the circle reflects the correlation coefficient either negative (blue) or positive (red). Data were analyzed using Spearman correlation coefficient (B & C). Significant P values are depicted (\* > 0.05; \*\* > 0.01; \*\*\* > 0.001; \*\*\*\* > 0.0001).
