# Supplementary material for: Immune Signature of Patients With Cardiovascular Disease Predicts Increased Risk for a Severe Course of COVID-19
Source: Preprints.org preprint supplement (doi:10.20944/preprints202311.1289.v1), 2023-11-21
Supplement: Supplementary file 11 [file supplementary]

**Table S4 CombROC mild vs severe**

| Combination | AUC   | SE    | SP  | CutOff | ACC   | TN | TP | FN | FP | NPV   | PPV   | Population                                                                                                                   |
|-------------|-------|-------|-----|--------|-------|----|----|----|----|-------|-------|------------------------------------------------------------------------------------------------------------------------------|
| 1           | 0,786 | 0,714 | 1   | 0,532  | 0,882 | 10 | 5  | 2  | 0  | 0,833 | 1     | CD14 <sup>+</sup> CD16 <sup>+</sup> monocytes                                                                                |
| 64          | 0,971 | 1     | 0,9 | 0,34   | 0,941 | 9  | 7  | 0  | 1  | 1     | 0,875 | intermediate effector CD8 <sup>+</sup> T cells & MAIT cells                                                                  |
| 263         | 0,971 | 1     | 0,9 | 0,295  | 0,941 | 9  | 7  | 0  | 1  | 1     | 0,875 | CD8 <sup>+</sup> NKT cells & intermediate effector CD8 <sup>+</sup> T cells & MAIT cells                                     |
| 308         | 0,971 | 1     | 0,9 | 0,328  | 0,941 | 9  | 7  | 0  | 1  | 1     | 0,875 | CD8 <sup>+</sup> HLA-DR <sup>+</sup> CD38 <sup>+</sup> T cells & intermediate effector CD8 <sup>+</sup> T cells & MAIT cells |
| 344         | 0,986 | 1     | 0,9 | 0,292  | 0,941 | 9  | 7  | 0  | 1  | 1     | 0,875 | cDC1 & intermediate effector CD8 <sup>+</sup> T cells & MAIT cells                                                           |
| 403         | 1     | 1     | 1   | 0,5    | 1     | 10 | 7  | 0  | 0  | 1     | 1     | intermediate effector CD8 <sup>+</sup> T cells & MAIT cells & NKT cells                                                      |

AUC, Area under curve; SE, sensitivity; SP, specificity; ACC, accuracy; TN, true negative; TP, true positives; FN, false negatives; FP, false positives; NPV, negative predictive value; PPV, positive predictive value

**Table S5 CombiROC mild vs moderate**

| Combination | AUC   | SE   | SP  | CutOff | ACC   | TN | TP | FN | FP | NPV   | PPV   | Population                                                                                                                                                                                                                   |
|-------------|-------|------|-----|--------|-------|----|----|----|----|-------|-------|------------------------------------------------------------------------------------------------------------------------------------------------------------------------------------------------------------------------------|
| 72          | 0,8   | 0,85 | 0,7 | 0,619  | 0,8   | 7  | 17 | 3  | 3  | 0,7   | 0,85  | MAIT cells & IgG <sup>+</sup> CD95 <sup>+</sup> B cells                                                                                                                                                                      |
| 429         | 0,885 | 0,65 | 1   | 0,747  | 0,767 | 10 | 13 | 7  | 0  | 0,588 | 1     | MAIT cells & plasmablasts & IgG <sup>+</sup> CD95 <sup>+</sup> B cells                                                                                                                                                       |
| 1436        | 0,935 | 0,8  | 1   | 0,764  | 0,867 | 10 | 16 | 4  | 0  | 0,714 | 1     | MAIT cells & plasmablasts & IgG <sup>+</sup> CD95 <sup>+</sup> B cells & NKT cells                                                                                                                                           |
| 2976        | 0,94  | 0,9  | 0,9 | 0,704  | 0,9   | 9  | 18 | 2  | 1  | 0,818 | 0,947 | CD8 <sup>+</sup> NKT cells & MAIT cells & plasmablasts & IgG <sup>+</sup> CD95 <sup>+</sup> B cells & NKT cells                                                                                                              |
| 5282        | 0,975 | 0,9  | 1   | 0,804  | 0,933 | 10 | 18 | 2  | 0  | 0,833 | 1     | CD4 <sup>+</sup> T <sub>emra</sub> cells & CD8 <sup>+</sup> HLA-DR <sup>+</sup> CD38 <sup>+</sup> T cells & IgG <sup>+</sup> CD95 <sup>+</sup> B cells & neutrophils & plasmablasts & NKT cells                              |
| 8384        | 0,98  | 0,95 | 1   | 0,749  | 0,967 | 10 | 19 | 1  | 0  | 0,909 | 1     | CD4 <sup>+</sup> T <sub>emra</sub> cells & CD8 <sup>+</sup> NKT cells & CD8 <sup>+</sup> HLA-DR <sup>+</sup> CD38 <sup>+</sup> T cells & IgG <sup>+</sup> CD95 <sup>+</sup> B cells & neutrophils & plasmablasts & NKT cells |
