# Supplementary material for: Immune Signature of Patients With Cardiovascular Disease Predicts Increased Risk for a Severe Course of COVID-19
Source: Preprints.org preprint supplement (doi:10.20944/preprints202311.1289.v1), 2023-11-21
Supplement: Supplementary file 13 [file supplementary]

|                                               |                    |                     |                    |                  |
|-----------------------------------------------|--------------------|---------------------|--------------------|------------------|
| Lymphocytes (1000/ $\mu$ L)                   | 1000 (665-1530)    | 1540 (1235-2135)    | 845 (610-1257)     | <b>&lt;0.001</b> |
| Hb (g/dL)                                     | 13.1 (12.0-13.9)   | 13.5 (12.6-13.9)    | 13.1 (11.9-13.8)   | 0.449            |
| Platelets (1000/ $\mu$ L)                     | 211.5 (160-297.8)  | 262.5 (203.5-298.8) | 176.5 (147-284.3)  | 0.094            |
| INR (%)                                       | 1 (1-1.1)          | 1 (1-1.1)           | 1 (1-1.2)          | 0.289            |
| PTT (s)                                       | 24 (22-27)         | 24 (23-27)          | 24 (22-27)         | 0.514            |
| D-Dimer ( $\mu$ g/dL)                         | 0.8 (0.6-1.8)      | 0.31 (0.31-0.31)    | 0.9 (0.6-1.8)      | 0.310            |
| Creatinine (mg/dL)                            | 0.8 (0.7-1.1)      | 0.8 (0.6-0.9)       | 0.9 (0.7-1.3)      | 0.100            |
| GFR-MDRD (ml/m <sup>2</sup> )                 | 79.8 (52.8-101.8)  |                     | 79.8 (52.8-101.8)  |                  |
| Sodium (mmol/L)                               | 139 (136-140)      | 140 (139-141)       | 137 (134.5-139)    | <b>&lt;0.001</b> |
| CRP (mg/dL)                                   | 1.4 (0.3-6.3)      | 0.2 (0.03-1)        | 3.1 (1.3-11.2)     | <b>&lt;0.001</b> |
| PCT (ng/mL)                                   | 0.1 (0.1-0.2)      |                     | 0.1 (0.1-0.2)      |                  |
| IL-6                                          | 24.3 (8.7-34.5)    |                     | 24.3 (8.7-34.5)    |                  |
| hs TNI (ng/dL)                                | 8 (3.8-18.5)       | 5 (3.3-7.8)         | 10.5 (5.3-22)      | <b>0.026</b>     |
| NT-pro-BNP (ng/L)                             | 410 (121-1349.3)   |                     | 519 (128.8-1487.5) | 0.144            |
| CK (U/L)                                      | 110.5 (65.3-185.5) | 84.5 (55-132)       | 121.5 (66.3-203.3) | 0.094            |
| AST (U/L)                                     | 32 (17-46)         | 17 (12.5-21)        | 41 (21-54)         | <b>&lt;0.001</b> |
| ALT (U/L)                                     | 24 (16.3-39)       | 19 (14.3-32)        | 30.5 (19-41.8)     | <b>0.042</b>     |
| LDH (U/L)                                     | 225 (191-290)      | 195 (172.3-209.3)   | 264 (218-361)      | <b>&lt;0.001</b> |
| HbA1c (%)                                     | 6.1 (5.8-6.5)      | 5.9 (5.5-6.0)       | 6.3 (5.8-6.5)      | <b>0.011</b>     |
| Concomitant cardiac medication at study entry |                    |                     |                    |                  |
| Oral anticoagulation                          | 11 (19.3)          | 6 (30)              | 5 (13.5)           | 0.215            |
| ACE-I or ARB                                  | 36 (63.2)          | 13 (65)             | 23 (62.2)          | 0.563            |
| Diuretics                                     | 15 (26.3)          | 3 (15)              | 12 (32.4)          | 0.147            |
| Calcium channel blockers                      | 12 (21.1)          | 5 (25)              | 7 (12.8)           | 0.594            |
| Beta blockers                                 | 23 (40.4)          | 6 (30)              | 17 (18.9)          | 0.263            |
| Statins                                       | 29 (50.9)          | 10 (50)             | 19 (51.4)          | 0.992            |
| ASA                                           | 23 (40.1)          | 10 (50)             | 13 (35.1)          | 0.238            |
| P2Y12-Inhibitor                               | 5 (8.8)            | 4 (20)              | 1 (2.7)            | 0.165            |
