# Supplementary material for: Immune Signature of Patients With Cardiovascular Disease Predicts Increased Risk for a Severe Course of COVID-19
Source: Preprints.org preprint supplement (doi:10.20944/preprints202311.1289.v1), 2023-11-21
Supplement: Supplementary file 14 [file supplementary]

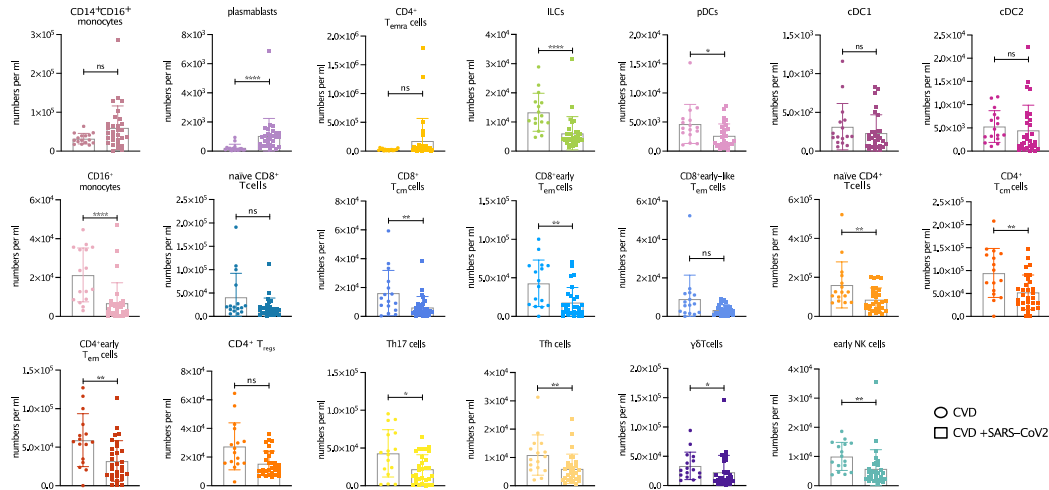

### Supplemental Figure 6: Differences between immune cell populations in CVD patients and SARS-CoV-2-infected CVD patients

Box plots show the abundance of the depicted cell populations defined by manual gating (Figure S2) of the individual samples from CVD and SARS-CoV-2-infected CVD patients. Data were analyzed using multiple Mann-Whitney non-parametric tests with false discovery rate. Significant differences between the two patient cohorts are marked with stars (\* > 0.05; \*\* > 0.01; \*\*\* > 0.001; \*\*\*\* > 0.0001).
