# Supplementary material for: Immune Signature of Patients With Cardiovascular Disease Predicts Increased Risk for a Severe Course of COVID-19
Source: Preprints.org preprint supplement (doi:10.20944/preprints202311.1289.v1), 2023-11-21
Supplement: Supplementary file 17 [file supplementary]

**Table S3 – Antibodies & Materials**

| Antibody               | Company                  | Catalognumber | Clone      | Concentration                          |
|------------------------|--------------------------|---------------|------------|----------------------------------------|
| CD1c AlexaFluor647     | BioLegend                | 331510        | L161       | 1,25 µg/ml                             |
| CD3 BV510              | BioLegend                | 317332        | OKT3       | 0,75 µg/ml                             |
| CD4 cFluorYG584        | Cytek Biosciences        | R7-20041      | SK3        | 0,25 µg/ml                             |
| CD8 BUV805             | BD Bioscience            | 612889        | SK1        | 0,8 µg/ml                              |
| CD11b PerCP-Cy5.5      | BioLegend                | 301338        | ICRF44     | 5 µg/ml                                |
| CD11c BUV661           | BD Bioscience            | 612967        | B-ly6      | 1,25 µl in 100 µl                      |
| CD14 Spark Blue 550    | BioLegend                | 367148        | 63D3       | 1,6 µg/ml                              |
| CD16 BUV496            | BD Bioscience            | 612944        | 3G8        | 0,6 µg/ml                              |
| CD19 Spark NIR 685     | BioLegend                | 302270        | HIB19      | 0,6 µg/ml                              |
| CD20 Pacific Orange    | Thermo Fisher Scientific | MHCD2030      | HI47       | 1,25 µl in 100 µl                      |
| CD24 PE Dazzle594      | BioLegend                | 311134        | ML5        | 2 µg/ml                                |
| CD25 PE                | BioLegend                | 302606        | BC96       | 0,75 µg/ml                             |
| CD27 APC               | BioLegend                | 356410        | M-T271     | 2,5 µg/ml                              |
| CD28 BV650             | BioLegend                | 302946        | CD28.2     | 1,5 µg/ml                              |
| CD38 APC Fire810       | BioLegend                | 102746        | HIT2       | 0,75 µg/ml                             |
| CD45 PerCP             | BioLegend                | 368506        | 2D1        | 2 µg/ml                                |
| CD45RA BUV395          | BD Bioscience            | 740315        | 5H9        | 2 µg/ml                                |
| CD56 BUV737            | BD Bioscience            | 612766        | NCAM16.2   | 2,5 µl in 100 µl                       |
| CD57 FITC              | BioLegend                | 359604        | HNK-1      | 0,6 µg/ml                              |
| CD95 PE/Cy5            | BioLegend                | 305610        | DX2        | 1,2 µg/ml                              |
| CD123 Super Bright436  | Thermo Fisher Scientific | 62-1239-42    | 6H6        | 0,3 µg/ml                              |
| CD127 APC-R700         | BD Bioscience            | 565185        | HIL-7R-M21 | 1,25 µl in 100 µl                      |
| CD141 BrilliantBlue515 | BD Bioscience            | 566017        | 1A4        | 3 µl from a 1:5 pre-dilution in 100 µl |
| CD161 eFluor450        | Thermo Fisher Scientific | 48-1619-42    | HP-3G10    | 1,25 µg/ml                             |
| CD183 (CXCR3) PE/Cy7   | BioLegend                | 353720        | G025H7     | 2 µg/ml                                |
| CD185 (CXCR5) BV750    | BD Bioscience            | 747111        | RF8B2      | 1,2 µg/ml                              |
| CD195 (CCR5) BUV563    | BD Bioscience            | 741401        | 2D7/CCR5   | 5 µg/ml                                |
