# Supplementary material for: Immune Signature of Patients With Cardiovascular Disease Predicts Increased Risk for a Severe Course of COVID-19
Source: Preprints.org preprint supplement (doi:10.20944/preprints202311.1289.v1), 2023-11-21
Supplement: Supplementary file 18 [file supplementary]

Archive with 52 entries (52 files):
- 20231115 Gu╠ênter et al Supplement Figures_1.pdf
- __MACOSX/._20231115 Gu╠ênter et al Supplement Figures_1.pdf
- 20231115 Gu╠ênter et al Supplement Figures_2.pdf
- __MACOSX/._20231115 Gu╠ênter et al Supplement Figures_2.pdf
- 20231115 Gu╠ênter et al Supplement Figures_3.pdf
- __MACOSX/._20231115 Gu╠ênter et al Supplement Figures_3.pdf
- 20231115 Gu╠ênter et al Supplement Figures_4.pdf
- __MACOSX/._20231115 Gu╠ênter et al Supplement Figures_4.pdf
- 20231115 Gu╠ênter et al Supplement Figures_5.pdf
- __MACOSX/._20231115 Gu╠ênter et al Supplement Figures_5.pdf
- 20231115 Gu╠ênter et al Supplement Figures_6.pdf
- __MACOSX/._20231115 Gu╠ênter et al Supplement Figures_6.pdf
- 20231115 Gu╠ênter et al Supplement Figures_7.pdf
- __MACOSX/._20231115 Gu╠ênter et al Supplement Figures_7.pdf
- 20231115 Gu╠ênter et al Supplement Figures_8.pdf
- __MACOSX/._20231115 Gu╠ênter et al Supplement Figures_8.pdf
- 20231115 Gu╠ênter et al Supplement Figures_9.pdf
- __MACOSX/._20231115 Gu╠ênter et al Supplement Figures_9.pdf
- 20231115 Gu╠ênter et al Supplement Figures_10.pdf
- __MACOSX/._20231115 Gu╠ênter et al Supplement Figures_10.pdf
- 20231115 Gu╠ênter et al Supplement Figures_11.pdf
- __MACOSX/._20231115 Gu╠ênter et al Supplement Figures_11.pdf
- 20231115 Gu╠ênter et al Supplement Figures_12.pdf
- __MACOSX/._20231115 Gu╠ênter et al Supplement Figures_12.pdf
- 20231115 Gu╠ênter et al Supplement Figures_13.pdf
- __MACOSX/._20231115 Gu╠ênter et al Supplement Figures_13.pdf
- 20231115 Gu╠ênter et al Supplement Figures_14.pdf
- __MACOSX/._20231115 Gu╠ênter et al Supplement Figures_14.pdf
- 20231115 Gu╠ênter et al Supplement Figures_15.pdf
- __MACOSX/._20231115 Gu╠ênter et al Supplement Figures_15.pdf
- 20231115 Gu╠ênter et al Supplement Figures_16.pdf
- __MACOSX/._20231115 Gu╠ênter et al Supplement Figures_16.pdf
- 20231115 Gu╠ênter et al Supplement Figures_17.pdf
- __MACOSX/._20231115 Gu╠ênter et al Supplement Figures_17.pdf
- 20231115 Gu╠ênter et al Supplement Figures_18.pdf
- __MACOSX/._20231115 Gu╠ênter et al Supplement Figures_18.pdf
- 20231115 Gu╠ênter et al Supplement Figures_19.pdf
- __MACOSX/._20231115 Gu╠ênter et al Supplement Figures_19.pdf
- 20231115 Gu╠ênter et al Supplement Figures_20.pdf
- __MACOSX/._20231115 Gu╠ênter et al Supplement Figures_20.pdf
- 20231115 Gu╠ênter et al Supplement Figures_21.pdf
- __MACOSX/._20231115 Gu╠ênter et al Supplement Figures_21.pdf
- 20231115 Gu╠ênter et al Supplement Figures_22.pdf
- __MACOSX/._20231115 Gu╠ênter et al Supplement Figures_22.pdf
- 20231115 Gu╠ênter et al Supplement Figures_23.pdf
- __MACOSX/._20231115 Gu╠ênter et al Supplement Figures_23.pdf
- 20231115 Gu╠ênter et al Supplement Figures_24.pdf
- __MACOSX/._20231115 Gu╠ênter et al Supplement Figures_24.pdf
- 20231115 Gu╠ênter et al Supplement Figures_25.pdf
- __MACOSX/._20231115 Gu╠ênter et al Supplement Figures_25.pdf
- 20231115 Gu╠ênter et al Supplement Figures_26.pdf
- __MACOSX/._20231115 Gu╠ênter et al Supplement Figures_26.pdf
