# Supplementary material for: Immune Signature of Patients With Cardiovascular Disease Predicts Increased Risk for a Severe Course of COVID-19
Source: Preprints.org preprint supplement (doi:10.20944/preprints202311.1289.v1), 2023-11-21
Supplement: Supplementary file 18 [file supplementary › 20231115 Gu╠ênter et al Supplement Figures_1.pdf]

## **Supplementary Material**

### **Immune signature of patients with cardiovascular disease predicts increased risk for a severe course of COVID-19**

Manina Günter<sup>1,2\*</sup>, Karin Anne Lydia Mueller<sup>3\*</sup>, Mathew Salazar<sup>2</sup>, Sarah Gekeler<sup>3</sup>, Carolin Prang<sup>3</sup>, Tobias Harm<sup>3</sup>, Meinrad Paul Gawaz<sup>3</sup>, and Stella E. Autenrieth<sup>1,2</sup>

<sup>1</sup>University Hospital Tuebingen, Department of Hematology, Oncology, Clinical Immunology and Rheumatology, Eberhard Karls University Tuebingen, Tuebingen, Germany

<sup>2</sup>German Cancer Research Centre, Research Group Dendritic Cells in Infection and Cancer, F171, Heidelberg, Germany

<sup>3</sup>University Hospital Tuebingen, Department of Cardiology and Angiology, Eberhard Karls University Tuebingen, Tuebingen, Germany

\* These authors contributed equally
