# Supplementary material for: Immune Signature of Patients With Cardiovascular Disease Predicts Increased Risk for a Severe Course of COVID-19
Source: Preprints.org preprint supplement (doi:10.20944/preprints202311.1289.v1), 2023-11-21
Supplement: Supplementary file 18 [file supplementary › 20231115 Gu╠ênter et al Supplement Figures_2.pdf]

| Approx. Emission Wavelength (nm) | UV            | Violet              | Blue                               | Yellow Green      | Red                 |
|----------------------------------|---------------|---------------------|------------------------------------|-------------------|---------------------|
| 395                              | CD45RA BUV395 |                     |                                    |                   |                     |
| 420                              | Viability UV  | CCR7 BV421          |                                    |                   |                     |
| 440                              |               | CD123 SB436         |                                    |                   |                     |
| 450                              |               | CD161 eFluor450     |                                    |                   |                     |
| 480                              |               | IgD BV480           |                                    |                   |                     |
| 500                              | CD16 BUV496   | CD3 BV510           | CD141 B8515                        |                   |                     |
| 520                              |               |                     | CD57 FITC                          |                   |                     |
| 550                              |               | CD20 Pacific Orange | CD14 Spark Blue 550                |                   |                     |
| 570                              | CCR5 BUV563   | IgM BV570           |                                    | CD25 PE           |                     |
| 580                              |               |                     |                                    | CD4 CF568         |                     |
| 600                              |               | IgG BV605           |                                    | CD24 PE Dazzle594 |                     |
| 660                              | CD11c BUV661  | CD28 BV650          |                                    |                   | CD27 APC            |
| 680                              |               |                     | CD45 PerCP                         | CD95 PE Cy5       | CD1c AlexaFluor 647 |
| 690                              |               |                     | CD11b PerCP Cy5.5                  |                   | CD19 Spark NIR 685  |
| 700                              |               | CCR6 BV711          | TCR $\gamma\delta$ PerCP eFluor710 |                   | CD127 APC-R700      |
| 730                              | CD56 BUV737   |                     |                                    |                   |                     |
| 750                              |               | CXCR5 BV750         |                                    |                   |                     |
| 780                              |               | PD-1 BV785          |                                    | CXCR3 PE Cy7      | HLA DR APC Fire750  |
| 800                              | CD8 BUV805    |                     |                                    |                   | CD38 APC Fire 810   |

T cells  
 NK cells  
 B cells  
 Monocytes  
 DCs

**Supplemental Figure 1: 36-color Panel used for the analysis of immune cell populations**  
 Antibody panel used for immune cell phenotyping on a five laser Aurora spectral flow cytometer. Colors depict the marker expression on the indicated cell populations.
