# Supplementary material for: Immune Signature of Patients With Cardiovascular Disease Predicts Increased Risk for a Severe Course of COVID-19
Source: Preprints.org preprint supplement (doi:10.20944/preprints202311.1289.v1), 2023-11-21
Supplement: Supplementary file 18 [file supplementary › 20231115 Gu╠ênter et al Supplement Figures_4.pdf]

#### Monocytes & Dendritic cell markers

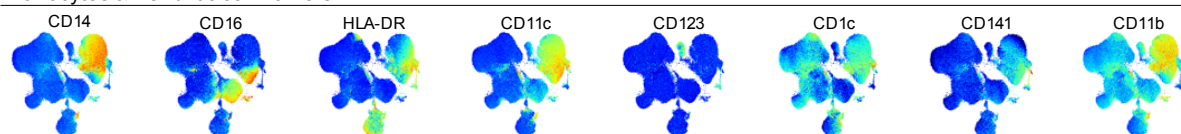

#### B cell markers

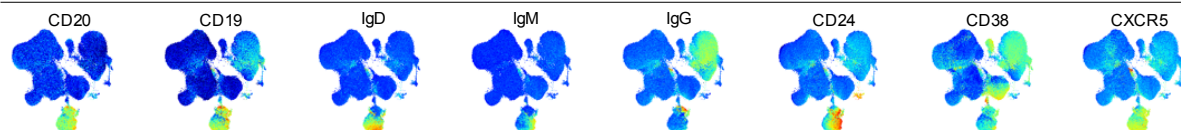

#### NK, NKT & gd T cell markers

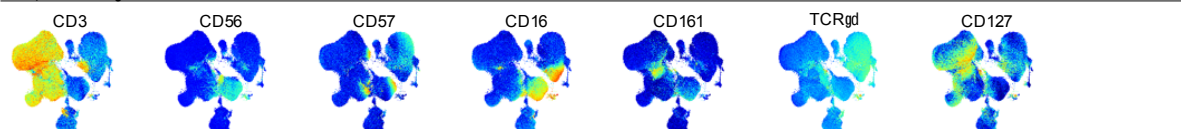

#### T cell markers

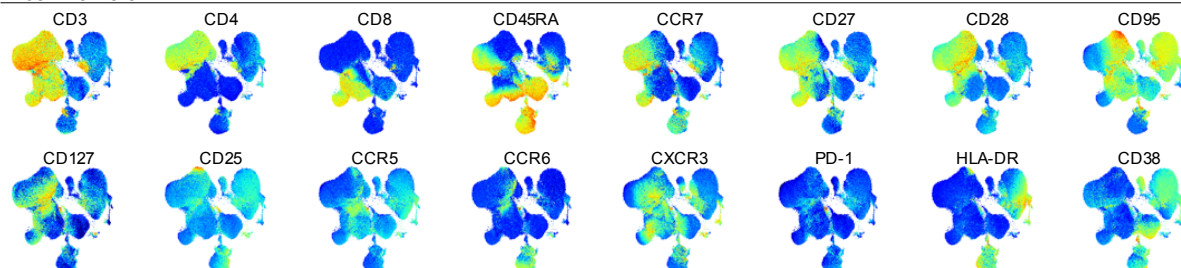

### Supplemental Figure 3: UMAP Dimensional Data Reduction of 36-color Panel

Visualization of the expression of phenotypic markers on PBMCs from healthy donors using UMAP. Marker expression intensity is indicated by the scale bar to the right of each plot, where red is high and blue is low.
