# Supplementary material for: Immune Signature of Patients With Cardiovascular Disease Predicts Increased Risk for a Severe Course of COVID-19
Source: Preprints.org preprint supplement (doi:10.20944/preprints202311.1289.v1), 2023-11-21
Supplement: Supplementary file 18 [file supplementary › 20231115 Gu╠ênter et al Supplement Figures_5.pdf]

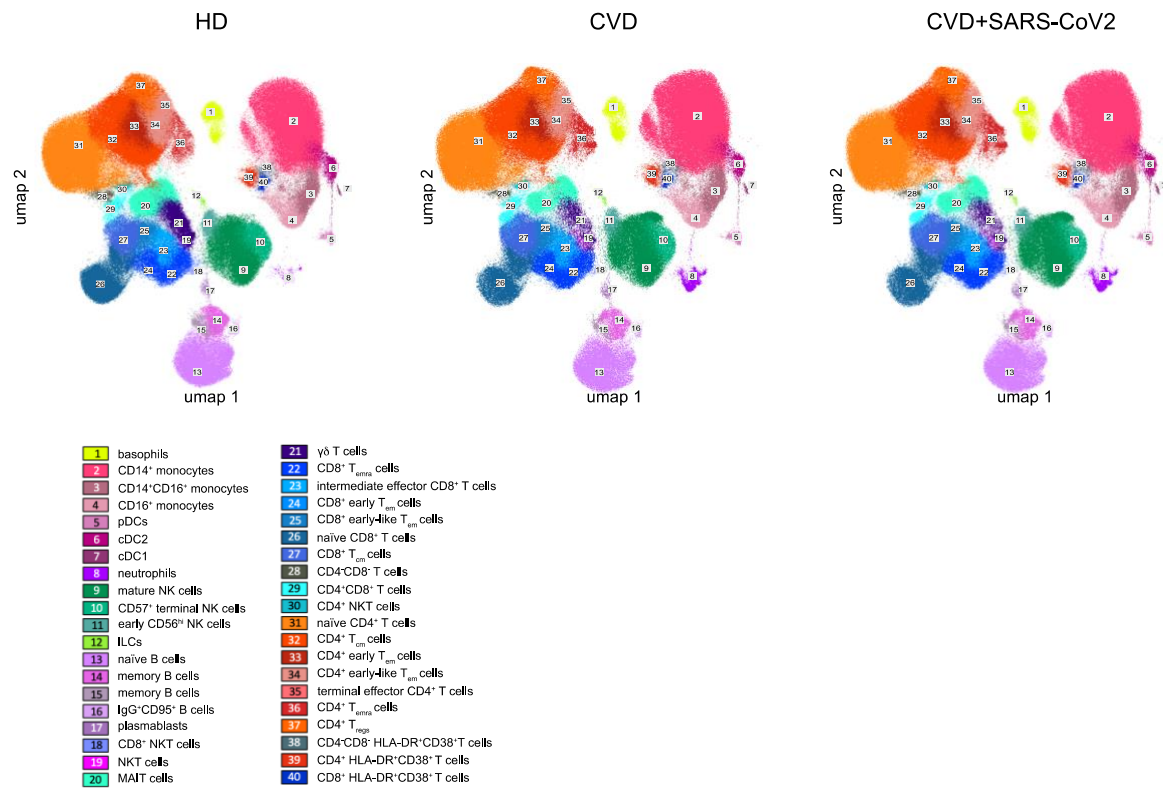

**Supplemental Figure 4:** High-dimensional data analysis of PBMCs displaying 40 FlowSOM clusters projected onto two UMAP dimensions. The UMAP-plots show concatenated events from PBMC samples from HD (37), CVD (20), and CVD + SARS-CoV-2-infected (37).
