# Supplementary material for: Immune Signature of Patients With Cardiovascular Disease Predicts Increased Risk for a Severe Course of COVID-19
Source: Preprints.org preprint supplement (doi:10.20944/preprints202311.1289.v1), 2023-11-21
Supplement: Supplementary file 18 [file supplementary › 20231115 Gu╠ênter et al Supplement Figures_6.pdf]

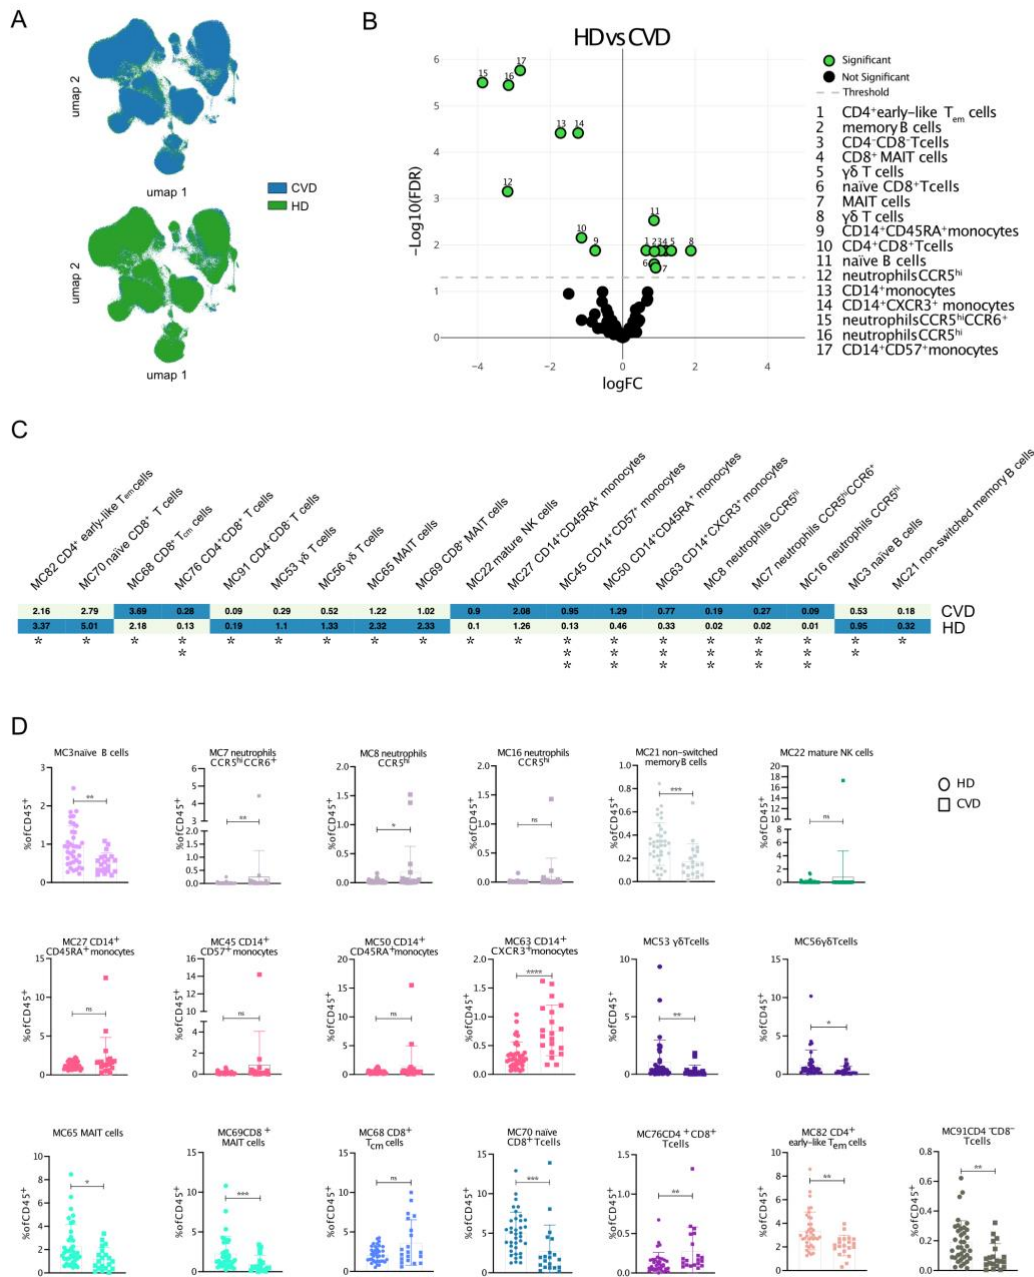

### Supplemental Figure 5: Differences between immune cell populations in CVD patients and HD

**A** The overlay UMAP-plot shows concatenated events from HD (37) and CVD patient (20) samples. **B** Volcano plot of statistical analysis comparing the frequency of cells in the defined FSOM clusters (Figure 1c) from CVD patients and HD using edgeR. Significant different clusters are depicted in green. **C** Clustered heatmap displaying the frequency of cells in the defined FSOM clusters from 36 concatenated samples from HD (lower row) and 16 CVD patients (upper row). The frequency is displayed per column on a scale from white (low) to blue (high). **D** Box plots show the abundance of the significantly different cell populations from the edgeR analysis of the individual samples from HD and CVD patients. Data were analyzed using multiple Mann-Whitney non-parametric tests with false discovery rate. Significant differences between the two patient cohorts are marked with stars (\* > 0.05; \*\* > 0.01; \*\*\* > 0.001, \*\*\*\* > 0.0001)
