# Supplementary material for: Immune Signature of Patients With Cardiovascular Disease Predicts Increased Risk for a Severe Course of COVID-19
Source: Preprints.org preprint supplement (doi:10.20944/preprints202311.1289.v1), 2023-11-21
Supplement: Supplementary file 18 [file supplementary › 20231115 Gu╠ênter et al Supplement Figures_12.pdf]

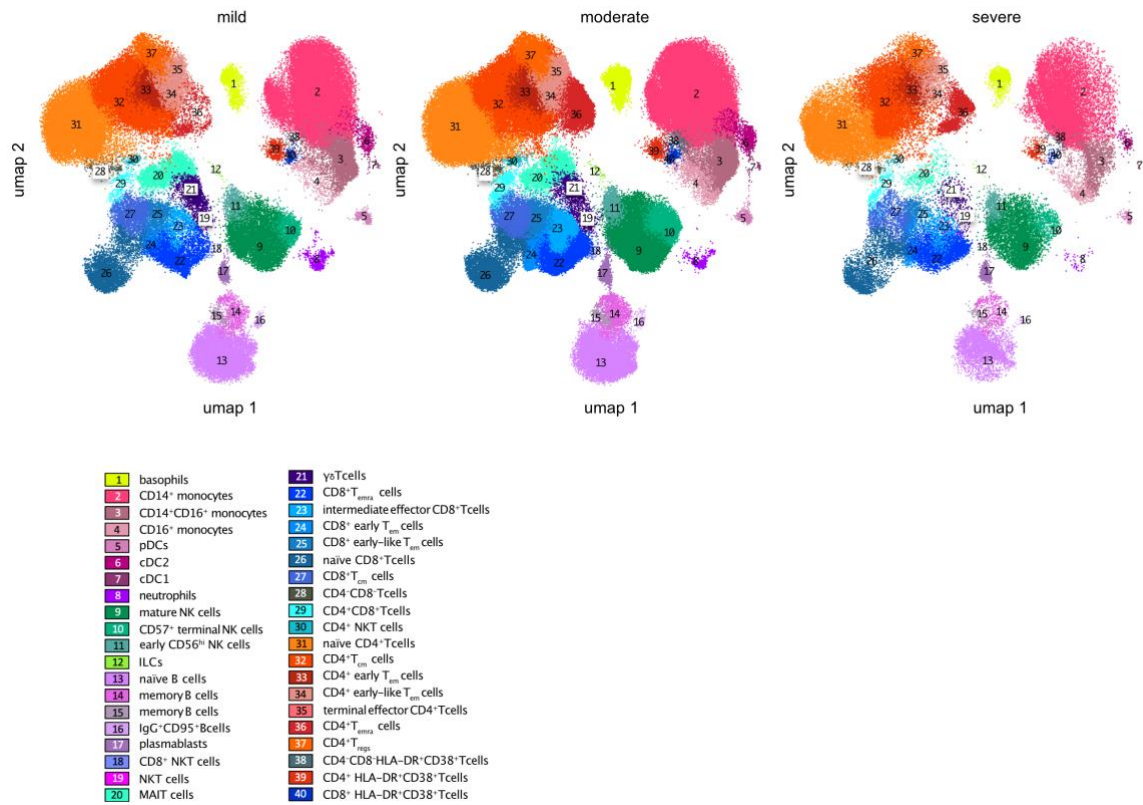

### Supplemental Figure 9:

High-dimensional data analysis of PBMCs displaying 40 FlowSOM clusters projected onto two UMAP dimensions. The UMAP plots show concatenated events from PBMC samples from CVD + SARS-CoV-2-infected patients (37) regarding severity (mild (10), moderate (20), and severe (7)).
