# Supplementary material for: Immune Signature of Patients With Cardiovascular Disease Predicts Increased Risk for a Severe Course of COVID-19
Source: Preprints.org preprint supplement (doi:10.20944/preprints202311.1289.v1), 2023-11-21
Supplement: Supplementary file 18 [file supplementary › 20231115 Gu╠ênter et al Supplement Figures_13.pdf]

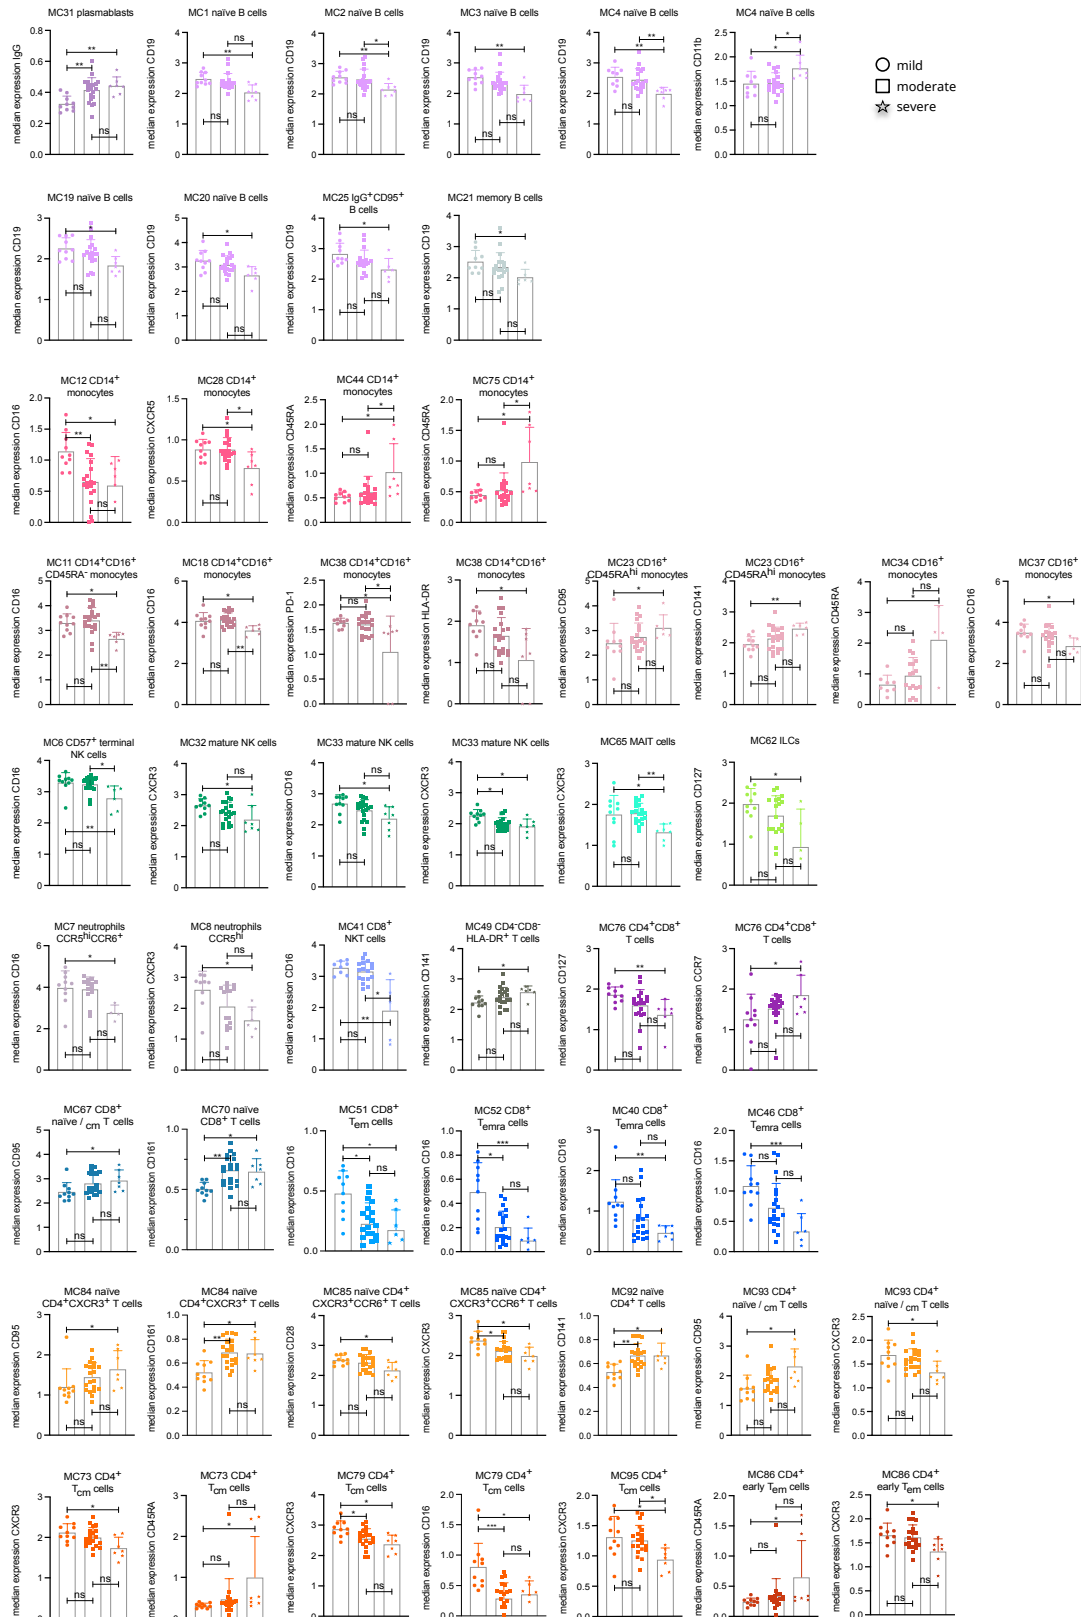

**Supplemental Figure 10: Different marker expression on immune cell populations in mild, moderate, and severe SARS-CoV-2-infected CVD patients**

Boxplots show depicted marker expression on various immune cell MCs (see Figure 2) from mild (10), moderate (20), and severe (7) SARS-CoV-2-infected CVD patients. Data were analyzed using Kruskal-Wallis non-parametric test with Dunn's post-test. Significant differences between the two patient cohorts are marked with stars (\* > 0.05; \*\* > 0.01; \*\*\* > 0.001).
