# Supplementary material for: Immune Signature of Patients With Cardiovascular Disease Predicts Increased Risk for a Severe Course of COVID-19
Source: Preprints.org preprint supplement (doi:10.20944/preprints202311.1289.v1), 2023-11-21
Supplement: Supplementary file 18 [file supplementary › 20231115 Gu╠ênter et al Supplement Figures_15.pdf]

**Table S1. Baseline characteristics of CVD patients at study entry stratified by presence of acute SARS-CoV-2 infection**

| Parameters                             | All patients<br>(n=57) | CVD (n=20)     | CVD-SARS-CoV-<br>2 (n=37) | p-Value          |
|----------------------------------------|------------------------|----------------|---------------------------|------------------|
| Clinical characteristics               |                        |                |                           |                  |
| Age (y)                                | 68 (58-80)             | 67 (59-78)     | 69 (57-81)                | 0.647            |
| Male                                   | 29 (50.9)              | 9 (45)         | 20 (54.1)                 | 0.514            |
| BMI (kg/m²)                            | 26.6 (24.9-29.6)       | 25 (23.3-27.3) | 27.4 (25.1-31.4)          | 0.091            |
| ICU admission                          | 11 (19.3)              | 0 (0)          | 11 (29.7)                 | <b>0.007</b>     |
| ARDS                                   |                        |                |                           |                  |
| - mild                                 | 19 (33.3)              | 0 (0)          | 19 (51.4)                 | <b>&lt;0.001</b> |
| - moderate                             | 8 (14)                 | 0 (0)          | 8 (21.6)                  |                  |
| - severe                               | 5 (8.7)                | 0 (0)          | 5 (13.5)                  |                  |
| Horovitz Index                         |                        |                |                           |                  |
| - HI > 300 mmHg                        | 33 (57.9)              | 20 (100)       | 13 (35.1)                 | <b>&lt;0.001</b> |
| - HI 201 - 300 mmHg                    | 4 (7)                  | 0 (0)          | 4 (10.8)                  |                  |
| - HI 101 - 200 mmHg                    | 11 (19.3)              | 0 (0)          | 11 (29.7)                 |                  |
| - HI ≤ 100 mmHg                        | 9 (15.8)               | 0 (0)          | 9 (24.3)                  |                  |
| High flow O <sub>2</sub> Therapy       | 5 (8.1)                | 0 (0)          | 5 (13.5)                  |                  |
| Mechanical ventilation                 | 8 (14)                 | 0 (0)          | 8 (21.6)                  |                  |
| Vasopressor                            | 6 (10.5)               | 0 (0)          | 6 (16.2)                  |                  |
| Lymphocyte count at Nadir<br>(1000/μl) | 0.8 (0.6-1.2)          |                | 0.8 (0.6-1.2)             |                  |
| Bacterial Co-Infection                 | 14 (24.6)              | 0 (0)          | 14 (37.8)                 | <b>0.025</b>     |
| Dialysis                               | 5 (8.1)                | 0 (0)          | 5 (13.5)                  |                  |
| Acute hepatic injury                   | 4 (7)                  | 0 (0)          | 4 (10.8)                  |                  |
| Symptoms on admission                  |                        |                |                           |                  |
| Cough                                  | 18 (31.6)              | 0 (0)          | 18 (48.6)                 | <b>&lt;0.001</b> |
| Dyspnea                                | 18 (31.6)              | 0 (0)          | 18 (48.6)                 | <b>&lt;0.001</b> |
| Fever                                  | 20 (35.1)              | 0 (0)          | 20 (54.1)                 | <b>&lt;0.001</b> |
| Cardiovascular risk factors            |                        |                |                           |                  |
| Arterial hypertension                  | 42 (73.7)              | 15 (75)        | 27 (73)                   | 0.868            |
| Dyslipidemia                           | 29 (50.9)              | 9 (45)         | 20 (54.1)                 | 0.449            |
| Diabetes mellitus                      | 10 (17.5)              | 2 (10)         | 8 (14.)                   | 0.271            |
