# Supplementary material for: Immune Signature of Patients With Cardiovascular Disease Predicts Increased Risk for a Severe Course of COVID-19
Source: Preprints.org preprint supplement (doi:10.20944/preprints202311.1289.v1), 2023-11-21
Supplement: Supplementary file 18 [file supplementary › 20231115 Gu╠ênter et al Supplement Figures_16.pdf]

|                                      |                  |                    |                  |       |
|--------------------------------------|------------------|--------------------|------------------|-------|
| Current smokers                      | 7 (12.3)         | 3 (15)             | 4 (10.8)         | 0.673 |
| Obesity                              | 18 (31.6)        | 5 (25)             | 13 (35.1)        | 0.393 |
| Atrial fibrillation                  | 14 (24.6)        | 6 (30)             | 8 (13.5)         | 0.520 |
| Chronic kidney disease               | 7 (12.3)         | 1 (5)              | 6 (16.2)         | 0.206 |
| COPD                                 | 3 (5.3)          | 0 (0)              | 3 (8.1)          | 0.184 |
| Malignoma                            | 8 (14.1)         | 5 (25)             | 3 (8.1)          | 0.088 |
| NYHA                                 |                  |                    |                  |       |
| - 1                                  | 10 (17.5)        | 8 (40)             | 2 (5.4)          | 0.001 |
| - 2                                  | 2 (3.5)          | 2 (10)             | 0 (0)            |       |
| - 3                                  | 2 (3.5)          | 1 (5)              | 1 (2.7)          |       |
| Parameters of echocardiography       |                  |                    |                  |       |
| Left ventricular hypertrophy         | 22 (38.6)        | 5 (25)             | 17 (45.9)        | 0.062 |
| Right ventricular function           | 3 (5.3)          | 0 (0)              | 3 (8.1)          | 0.433 |
| Right ventricular dilatation         | 13 (22.8)        | 1 (5)              | 12 (32.4)        | 0.057 |
| PE                                   | 17 (29.8)        | 0 (0)              | 17 (45.9)        | 0.003 |
| Pleural effusion                     | 10 (17.6)        | 1 (5)              | 9 (24.3)         | 0.676 |
| Bilateral nodular opacities          | 19 (33.3)        | 0 (0)              | 19 (51.4)        | 0.328 |
| Ground-glass opacities               | 9 (15.8)         | 0 (0)              | 9 (24.3)         | 0.410 |
| Peribronchial thickening             | 2 (3.5)          | 0 (0)              | 2 (5.4)          | 0.732 |
| Focal consolidations                 | 9 (15.8)         | 0 (0)              | 9 (24.3)         | 0.410 |
| Venous congestion                    | 6 (10.5)         | 0 (0)              | 6 (16.2)         | 0.522 |
| Atelectasis                          | 1 (1.8)          | 0 (0)              | 1 (2.7)          | 0.809 |
| Parameters of electrocardiography    |                  |                    |                  |       |
| Heart Rate (bpm)                     | 76 (67-84)       | 69 (64.3-82.8)     | 77 (67.5-85.5)   | 0.311 |
| Systolic blood pressure (mmHg)       | 140 (130-151.3)  | 145 (130-165)      | 140 (125-150)    | 0.372 |
| Heart Rhythm                         |                  |                    |                  |       |
| - Sinus rhythm                       | 48 (90.4)        | 18 (90.4)          | 30 (90.4)        | 0.468 |
| - Atrial fibrillation                | 4 (7)            | 1 (5)              | 3 (8.1)          |       |
| - PM                                 | 1 (1.8)          | 0 (0)              | 1 (2.7)          |       |
| - SVT                                | 1 (1.8)          | 1 (5)              | 0 (0)            |       |
| Laboratory parameters and biomarkers |                  |                    |                  |       |
| Leukocytes (1000/μL)                 | 6945 (4900-8925) | 7415 (6010-8747.5) | 6265 (4215-8965) | 0.700 |
