# Supplementary material for: Immune Signature of Patients With Cardiovascular Disease Predicts Increased Risk for a Severe Course of COVID-19
Source: Preprints.org preprint supplement (doi:10.20944/preprints202311.1289.v1), 2023-11-21
Supplement: Supplementary file 18 [file supplementary › 20231115 Gu╠ênter et al Supplement Figures_18.pdf]

**Table S1** Values are n (%) or are given as median and interquartile range (IQR). ACE - Angiotensin Converting Enzyme. Afib – atrial fibrillation. ALT – alanine amino-transferase. ARB – Angiotensin II receptor blockers. ARDS – Acute respiratory distress syndrome. ASA – Acetylsalicylic acid. AST – aspartate-aminotransferase. BMI – body mass index. CAD – coronary artery disease. CK – creatinine kinase. COPD – chronic obstructive pulmonary disease. CVD – cardio vascular disease. CRP – C-reactive protein. GFR-MDRD – glomerular filtration rate. Hb – hemoglobin. HI – Horovitz Index. hs TNI – high sensitive Troponin I. ICU – Intensive care unit. INR – international normalized ratio. LDH – lactate dehydrogenase. NT-pro-BNP – N-terminal pro- brain natriuretic peptide. NYHA – New York Heart Association. PCT – procalcitonin. PE – pericardial effusion. PM – Pacemaker. PTT – partial thromboplastin time. SARS-CoV-2 – severe acute respiratory syndrome coronavirus-2. SVT – supraventricular tachycardia.
