# Supplementary material for: Immune Signature of Patients With Cardiovascular Disease Predicts Increased Risk for a Severe Course of COVID-19
Source: Preprints.org preprint supplement (doi:10.20944/preprints202311.1289.v1), 2023-11-21
Supplement: Supplementary file 18 [file supplementary › 20231115 Gu╠ênter et al Supplement Figures_19.pdf]

**Table S2. Baseline characteristics of SARS-CoV-2 infected CVD patients at study entry stratified by ISARIC-WHO-4C-Mortality-Score**

| Parameters                          | All patients<br>(n=37) | Mild (n=10)      | Moderate<br>(n=20) | Severe (n=7)   | p-<br>Value      |
|-------------------------------------|------------------------|------------------|--------------------|----------------|------------------|
| Clinical characteristics            |                        |                  |                    |                |                  |
| Age (y)                             | 69 (57-81)             | 60 (53-68)       | 79 (58-81)         | 70 (64-84)     | <b>0.016</b>     |
| Male                                | 20 (54.1)              | 6 (60)           | 9 (45)             | 5 (71.4)       | 0.438            |
| BMI (kg/m²)                         | 27.4 (25.1-31.4)       | 29.4 (27.7-34.8) | 26.2 (24.4-31)     | 25.6 (25-28.7) | <b>0.022</b>     |
| ICU admission                       | 11 (29.7)              | 0 (0)            | 4 (20)             | 7 (100)        | <b>&lt;0.001</b> |
| ARDS                                |                        |                  |                    |                |                  |
| - mild                              | 19 (51.4)              | 7 (70)           | 11 (55)            | 1 (14.3)       | <b>0.010</b>     |
| - moderate                          | 8 (21.6)               | 1 (10)           | 5 (25)             | 2 (28.6)       |                  |
| - severe                            | 5 (13.5)               | 0 (0)            | 1 (5)              | 4 (57.1)       |                  |
| Horovitz Index                      |                        |                  |                    |                |                  |
| - HI > 300 mmHg                     | 13 (35.1)              | 10 (100)         | 3 (15)             | 0 (0)          | <b>&lt;0.001</b> |
| - HI 201 - 300 mmHg                 | 4 (10.8)               | 0 (0)            | 4 (20)             | 0 (0)          |                  |
| - HI 101 - 200 mmHg                 | 11 (29.7)              | 0 (0)            | 11 (55)            | 0 (0)          |                  |
| - HI ≤ 100 mmHg                     | 9 (24.3)               | 0 (0)            | 2 (10)             | 7 (100)        |                  |
| High flow O <sub>2</sub> Therapy    | 5 (13.5)               | 0 (0)            | 1 (5)              | 4 (57.1)       | <b>0.002</b>     |
| Mechanical ventilation              | 8 (21.6)               | 0 (0)            | 3 (15)             | 5 (71.4)       | <b>0.002</b>     |
| Vasopressor                         | 6 (16.2)               | 0 (0)            | 2 (10)             | 4 (57.1)       | <b>0.009</b>     |
| Lymphocyte count at Nadir (1000/μl) | 0.8 (0.6-1.2)          | 0.9 (0.6-1.3)    | 0.8 (0.6-1.6)      | 0.6 (0.5-1)    | 0.505            |
| Bacterial Co-Infection              | 14 (37.8)              | 2 (20)           | 6 (30)             | 6 (85.7)       | <b>0.012</b>     |
| Dialysis                            | 5 (13.5)               | 1 (10)           | 3 (15)             | 1 (14.3)       | 0.255            |
| Acute hepatic injury                | 4 (10.8)               | 0 (0)            | 3 (15)             | 1 (14.3)       | 0.451            |
| Symptoms on admission               |                        |                  |                    |                |                  |
| Cough                               | 18 (48.6)              | 3 (30)           | 11 (55)            | 4 (57.1)       | 0.330            |
| Dyspnea                             | 18 (48.6)              | 5 (50)           | 10 (50)            | 3 (42.9)       | 0.907            |
| Fever                               | 20 (54.1)              | 6 (60)           | 9 (45)             | 5 (71.4)       | 0.519            |
| Cardiovascular risk factors         |                        |                  |                    |                |                  |
| Arterial hypertension               | 27 (73)                | 7 (70)           | 14 (70)            | 6 (85.7)       | 0.701            |
| Dyslipidemia                        | 20 (54.1)              | 7 (70)           | 11 (55)            | 2 (28.6)       | 0.229            |
