# Supplementary material for: Immune Signature of Patients With Cardiovascular Disease Predicts Increased Risk for a Severe Course of COVID-19
Source: Preprints.org preprint supplement (doi:10.20944/preprints202311.1289.v1), 2023-11-21
Supplement: Supplementary file 18 [file supplementary › 20231115 Gu╠ênter et al Supplement Figures_20.pdf]

|                                      |                |                   |                   |               |       |
|--------------------------------------|----------------|-------------------|-------------------|---------------|-------|
| Diabetes mellitus                    | 8 (14.)        | 2 (20)            | 4 (20)            | 2 (28.6)      | 0.884 |
| Current smokers                      | 4 (10.8)       | 2 (20)            | 1 (5)             | 1 (14.3)      | 0.465 |
| Obesity                              | 13 (35.1)      | 5 (50)            | 6 (30)            | 2 (28.6)      | 0.555 |
| Atrial fibrillation                  | 8 (13.5)       | 1 (10)            | 4 (20)            | 3 (42.9)      | 0.272 |
| COPD                                 | 3 (8.1)        | 0 (0)             | 2 (10)            | 1 (14.3)      | 0.508 |
| Malignoma                            | 3 (8.1)        | 0 (0)             | 2 (10)            | 1 (14.3)      | 0.508 |
| NYHA                                 |                |                   |                   |               |       |
| - 1                                  | 2 (5.4)        | 0 (0)             | 1 (5)             | 1 (14.3)      | 0.640 |
| - 2                                  | 0 (0)          | 0 (0)             | 0 (0)             | 0 (0)         |       |
| - 3                                  | 1 (2.7)        | 0 (0)             | 1 (5)             | 0 (0)         |       |
| Parameters of echocardiography       |                |                   |                   |               |       |
| Right ventricular function           | 3 (8.1)        | 0 (0)             | 2 (10)            | 1 (14.3)      | 0.640 |
| Right ventricular dilatation         | 12 (32.4)      | 4 (40)            | 7 (35)            | 1 (14.3)      | 0.729 |
| PE                                   | 17 (45.9)      | 1 (10)            | 12 (60)           | 4 (57.1)      | 0.097 |
| Pleural effusion                     | 9 (24.3)       | 2 (20)            | 4 (20)            | 3 (42.9)      | 0.345 |
| Bilateral nodular opacities          | 19 (51.4)      | 6 (60)            | 9 (45)            | 4 (57.1)      | 0.472 |
| Ground-glass opacities               | 9 (24.3)       | 2 (20)            | 4 (20)            | 3 (42.9)      | 0.509 |
| Peribronchial thickening             | 2 (5.4)        | 1 (10)            | 0 (0)             | 1 (14.3)      | 0.256 |
| Focal consolidations                 | 9 (24.3)       | 3 (30)            | 4 (20)            | 2 (28.6)      | 0.771 |
| Venous congestion                    | 6 (16.2)       | 0 (0)             | 4 (20)            | 2 (28.6)      | 0.258 |
| Atelectasis                          | 1 (2.7)        | 0 (0)             | 0 (0)             | 1 (14.3)      | 0.128 |
| Parameters of electrocardiography    |                |                   |                   |               |       |
| Heart Rate (bpm)                     | 77 (67.5-85.5) | 73 (66.3-85.5)    | 77.5 (68.3-84.3)  | 79 (72-92)    | 0.773 |
| Systolic blood pressure (mmHg)       | 140 (125-150)  | 137.5 (120-142.5) | 145 (119.3-151.3) | 140 (130-147) | 0.145 |
| Heart Rhythm                         |                |                   |                   |               |       |
| - Sinus rhythm                       | 30 (90.4)      | 8 (80)            | 15 (75)           | 7 (100)       | 0.768 |
| - Atrial fibrillation                | 3 (8.1)        | 1 (10)            | 2 (10)            | 0 (0)         |       |
| - PM                                 | 1 (2.7)        | 0 (0)             | 1 (5)             | 0 (0)         |       |
| - SVT                                | 0 (0)          | 0 (0)             | 0 (0)             | 0 (0)         |       |
| Laboratory parameters and biomarkers |                |                   |                   |               |       |
