# Supplementary material for: Immune Signature of Patients With Cardiovascular Disease Predicts Increased Risk for a Severe Course of COVID-19
Source: Preprints.org preprint supplement (doi:10.20944/preprints202311.1289.v1), 2023-11-21
Supplement: Supplementary file 18 [file supplementary › 20231115 Gu╠ênter et al Supplement Figures_21.pdf]

|                                               |                    |                     |                   |                   |              |
|-----------------------------------------------|--------------------|---------------------|-------------------|-------------------|--------------|
| Leukocytes (1000/ $\mu$ L)                    | 6265 (4215-8965)   | 6935 (3552.5-10635) | 5940 (4590-7740)  | 6970 (4290-9810)  | 0.907        |
| Lymphocytes (1000/ $\mu$ L)                   | 845 (610-1257)     | 1095 (735-1360)     | 890 (670-1520)    | 530 (410-650)     | <b>0.011</b> |
| Hb (g/dL)                                     | 13.1 (11.9-13.8)   | 13.6 (11.3-14.4)    | 13 (12-13.4)      | 13.3 (11.9-14)    | 0.258        |
| Platelets (1000/ $\mu$ L)                     | 176.5 (147-284.3)  | 192.5 (147-326.8)   | 191 (143-246)     | 164 (143-334)     | 0.907        |
| INR (%)                                       | 1 (1-1.2)          | 1.1 (1-1.2)         | 1 (1-1.2)         | 1 (1-1.1)         | 0.636        |
| PTT (s)                                       | 24 (22-27)         | 23.5 (22-28)        | 23 (22-25)        | 26 (23-28)        | 0.333        |
| D-Dimer ( $\mu$ g/dL)                         | 0.9 (0.6-1.8)      | 0.31 (0.31-0.31)    | 0.9 (0.6-1.8)     | 1.7 (0.9-2.2)     | 0.576        |
| Creatinine (mg/dL)                            | 0.9 (0.7-1.3)      | 0.9 (0.8-1.4)       | 0.9 (0.7-1.1)     | 1 (0.6-1.4)       | 0.598        |
| GFR-MDRD (ml/m <sup>2</sup> )                 | 79.8 (52.8-101.8)  | 74.1 (49.6-102.9)   | 80.1 (58.5-108.4) | 73.9 (48.3-100.6) | 0.788        |
| Sodium (mmol/L)                               | 137 (134.5-139)    | 138 (136-140)       | 136.5 (134.3-139) | 135 (126-140)     | 0.699        |
| CRP (mg/dL)                                   | 3.1 (1.3-11.2)     | 2.1 (0.6-6.2)       | 2.5 (1.3-8.6)     | 12.5 (11.9-18.3)  | <b>0.011</b> |
| PCT (ng/mL)                                   | 0.1 (0.1-0.2)      | 0.1 (0-0.2)         | 0.1 (0.1-0.2)     | 0.2 (0.1-0.4)     | 0.128        |
| IL-6                                          | 24.3 (8.7-34.5)    | 9.9 (5.9-18.4)      | 21.8 (8.2-36.5)   | 34.1 (31.5-63)    | <b>0.007</b> |
| hs TNI (ng/dL)                                | 10.5 (5.3-22)      | 8 (2.5-38)          | 8 (6-22)          | 18 (12-26.3)      | 0.185        |
| NT-pro-BNP (ng/L)                             | 519 (128.8-1487.5) | 133 (105.5-626.5)   | 595 (119-11911)   | 1213 (602-9856.3) | 0.064        |
| CK (U/L)                                      | 121.5 (66.3-203.3) | 91 (62.8-195.3)     | 122 (67-217)      | 188 (116-207)     | 0.230        |
| AST (U/L)                                     | 41 (21-54)         | 29.5 (16.3-49)      | 39.5 (25.8-55)    | 43 (39-62)        | 0.774        |
| ALT (U/L)                                     | 30.5 (19-41.8)     | 34 (18.5-41.8)      | 30 (19-42)        | 26 (18-63)        | 0.742        |
| LDH (U/L)                                     | 264 (218-361)      | 221.5 (174.8-270.5) | 286 (217.3-338.5) | 367 (249-483)     | 0.079        |
| HbA1c (%)                                     | 6.3 (5.8-6.5)      | 6.1 (5.7-6.6)       | 6.1 (5.9-6.4)     | 6.4 (6.1-6.9)     | 0.621        |
| Concomitant cardiac medication at study entry |                    |                     |                   |                   |              |
| Oral anticoagulation                          | 5 (13.5)           | 2 (20)              | 2 (10)            | 1 (14.3)          | 0.390        |
| ACE-I or ARB                                  | 23 (62.2)          | 6 (60)              | 12 (60)           | 5 (71.4)          | 0.087        |
| Diuretics                                     | 12 (32.4)          | 4 (40)              | 1 (5)             | 1 (14.3)          | 0.425        |
