# Supplementary material for: Immune Signature of Patients With Cardiovascular Disease Predicts Increased Risk for a Severe Course of COVID-19
Source: Preprints.org preprint supplement (doi:10.20944/preprints202311.1289.v1), 2023-11-21
Supplement: Supplementary file 18 [file supplementary › 20231115 Gu╠ênter et al Supplement Figures_22.pdf]

|                          |           |        |         |          |       |
|--------------------------|-----------|--------|---------|----------|-------|
| Calcium channel blockers | 7 (12.8)  | 2 (20) | 5 (25)  | 0 (0)    | 0.324 |
| Beta blockers            | 17 (18.9) | 5 (50) | 9 (45)  | 3 (42.8) | 0.959 |
| Statins                  | 19 (51.4) | 6 (60) | 10 (50) | 3 (42.8) | 0.784 |
| ASA                      | 13 (35.1) | 4 (40) | 7 (35)  | 2 (28.6) | 0.886 |
| P2Y12-Inhibitor          | 1 (2.7)   | 0 (0)  | 1 (5)   | 0 (0)    | 0.663 |

**Table S2** Values are n (%) or are given as median and interquartile range (IQR). ACE - Angiotensin Converting Enzyme. Afib – atrial fibrillation. ALT – alanine amino-transferase. ARB – Angiotensin II receptor blockers. ARDS – Acute respiratory distress syndrome. ASA – Acetylsalicylic acid. AST – aspartate-aminotransferase. BMI – body mass index. CAD – coronary artery disease. CK – creatinine kinase. COPD – chronic obstructive pulmonary disease. CVD – cardio vascular disease. CRP – C-reactive protein. GFR-MDRD – glomerular filtration rate. Hb – hemoglobin. HI – Horovitz Index. hs TNI – high sensitive Troponin I. ICU – Intensive care unit. INR – international normalized ratio. LDH – lactate dehydrogenase. NT-pro-BNP – N-terminal pro- brain natriuretic peptide. NYHA – New York Heart Association. PCT – procalcitonin. PE – pericardial effusion. PM – Pacemaker. PTT – partial thromboplastin time. SARS-CoV-2 – severe acute respiratory syndrome coronavirus-2. SVT – supraventricular tachycardia.
