# Supplementary material for: Immune Signature of Patients With Cardiovascular Disease Predicts Increased Risk for a Severe Course of COVID-19
Source: Preprints.org preprint supplement (doi:10.20944/preprints202311.1289.v1), 2023-11-21
Supplement: Supplementary file 18 [file supplementary › 20231115 Gu╠ênter et al Supplement Figures_24.pdf]

| CD196 (CCR6) BV711                           | BioLegend                | 353436         | G034E3   | 0,6 µg/ml                               |
|----------------------------------------------|--------------------------|----------------|----------|-----------------------------------------|
| CD197 (CCR7) BV421                           | BioLegend                | 353208         | G043H7   | 3,5 µg/ml                               |
| CD279 (PD-1) BV785                           | BioLegend                | 329930         | EH12.2H7 | 5 µg/ml                                 |
| HLA-DR APC Fire750                           | BioLegend                | 307658         | L243     | 1,2 µg/ml                               |
| IgD BV480                                    | BD Bioscience            | 566138         | IA6-2    | 4 µl from a 1:10 pre-dilution in 100 µl |
| IgG BV605                                    | BD Bioscience            | 563246         | G18-145  | 1 µg/ml                                 |
| IgM BV570                                    | BioLegend                | 314517         | MHM-88   | 2,5 µl in 100 µl                        |
| TCRγδ PerCPeFluor710                         | Thermo Fisher Scientific | 46-9959-42     | B1.1     | 4 µg/ml                                 |
| Materials                                    | Company                  | Catalog number |          |                                         |
| Human True StainFcX                          | BioLegend                | 422302         |          |                                         |
| True Stain Monocyte block                    | BioLegend                | 426103         |          |                                         |
| Cell Staining Buffer                         | BioLegend                | 420201         |          |                                         |
| True-Nuclear Transcription Factor Buffer Set | BioLegend                | 424401         |          |                                         |
| Human True StainFcX                          | BioLegend                | 422302         |          |                                         |
| DNase                                        | Merck-Millipore          | 260913-10MU    |          |                                         |
| FCS                                          | Sigma                    |                |          |                                         |
| RPMI1640                                     | Sigma                    | R0883          |          |                                         |
| DPBS                                         | Gibco                    | 14190          |          |                                         |
