# Supplementary material for: Immune Signature of Patients With Cardiovascular Disease Predicts Increased Risk for a Severe Course of COVID-19
Source: Preprints.org preprint supplement (doi:10.20944/preprints202311.1289.v1), 2023-11-21
Supplement: Supplementary file 18 [file supplementary › 20231115 Gu╠ênter et al Supplement Figures_26.pdf]

**Table S6 CombiROC mild vs moderate & severe**

| Combi-<br>nation | AUC   | SE    | SP  | CutOff | ACC   | TN | TP | FN | FP | NPV   | PPV   | Population                                                                                                                                                                                                         |
|------------------|-------|-------|-----|--------|-------|----|----|----|----|-------|-------|--------------------------------------------------------------------------------------------------------------------------------------------------------------------------------------------------------------------|
| 76               | 0,811 | 0,852 | 0,7 | 0,621  | 0,811 | 7  | 23 | 4  | 3  | 0,636 | 0,885 | MAIT cells & plasmablasts                                                                                                                                                                                          |
| 429              | 0,911 | 0,704 | 1   | 0,765  | 0,784 | 10 | 19 | 8  | 0  | 0,556 | 1     | MAIT cells & plasmablasts<br>& IgG <sup>+</sup> CD95 <sup>+</sup> B cells                                                                                                                                          |
| 1436             | 0,93  | 0,815 | 1   | 0,776  | 0,865 | 10 | 22 | 5  | 0  | 0,667 | 1     | MAIT cells & plasmablasts<br>& IgG <sup>+</sup> CD95 <sup>+</sup> B cells &<br>NKT cells                                                                                                                           |
| 2449             | 0,959 | 0,926 | 0,9 | 0,538  | 0,919 | 9  | 25 | 2  | 1  | 0,818 | 0,962 | CD4 <sup>+</sup> T <sub>emra</sub> cells & CD8 <sup>+</sup><br>HLA-DR <sup>+</sup> CD38 <sup>+</sup> T cells &<br>IgG <sup>+</sup> CD95 <sup>+</sup> B cells &<br>neutrophils & plasmablasts                       |
| 3312             | 0,922 | 0,815 | 1   | 0,796  | 0,865 | 10 | 22 | 5  | 0  | 0,667 | 1     | MAIT cells & plasmablasts<br>& IgG <sup>+</sup> CD95 <sup>+</sup> B cells &<br>NKT cells & cDC1                                                                                                                    |
| 5152             | 0,978 | 0,926 | 1   | 0,817  | 0,946 | 10 | 25 | 2  | 0  | 0,833 | 1     | CD4 <sup>+</sup> T <sub>emra</sub> cells & CD8 <sup>+</sup><br>HLA-DR <sup>+</sup> CD38 <sup>+</sup> T cells &<br>IgG <sup>+</sup> CD95 <sup>+</sup> B cells &<br>neutrophils & plasmablasts<br>& cDC1             |
| 8762             | 0,981 | 0,926 | 1   | 0,818  | 0,946 | 10 | 25 | 2  | 0  | 0,833 | 1     | CD4 <sup>+</sup> T <sub>emra</sub> cells & CD8 <sup>+</sup><br>HLA-DR <sup>+</sup> CD38 <sup>+</sup> T cells &<br>IgG <sup>+</sup> CD95 <sup>+</sup> B cells &<br>neutrophils & plasmablasts<br>& cDC1 & NKT cells |
