# Supplementary figures and images for: Immune Signature of Patients With Cardiovascular Disease Predicts Increased Risk for a Severe Course of COVID-19
Source: Preprints.org preprint supplement (doi:10.20944/preprints202311.1289.v1), 2023-11-21

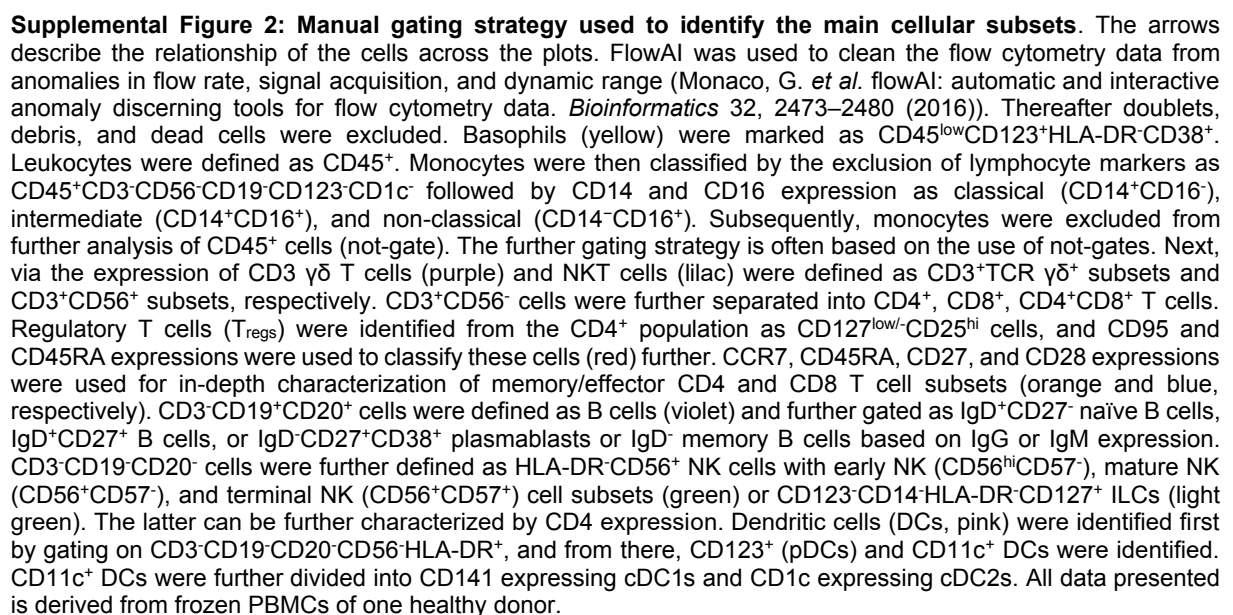

Supplement: Supplementary file 18 [file supplementary › 20231115 Gu╠ênter et al Supplement Figures_3.pdf]

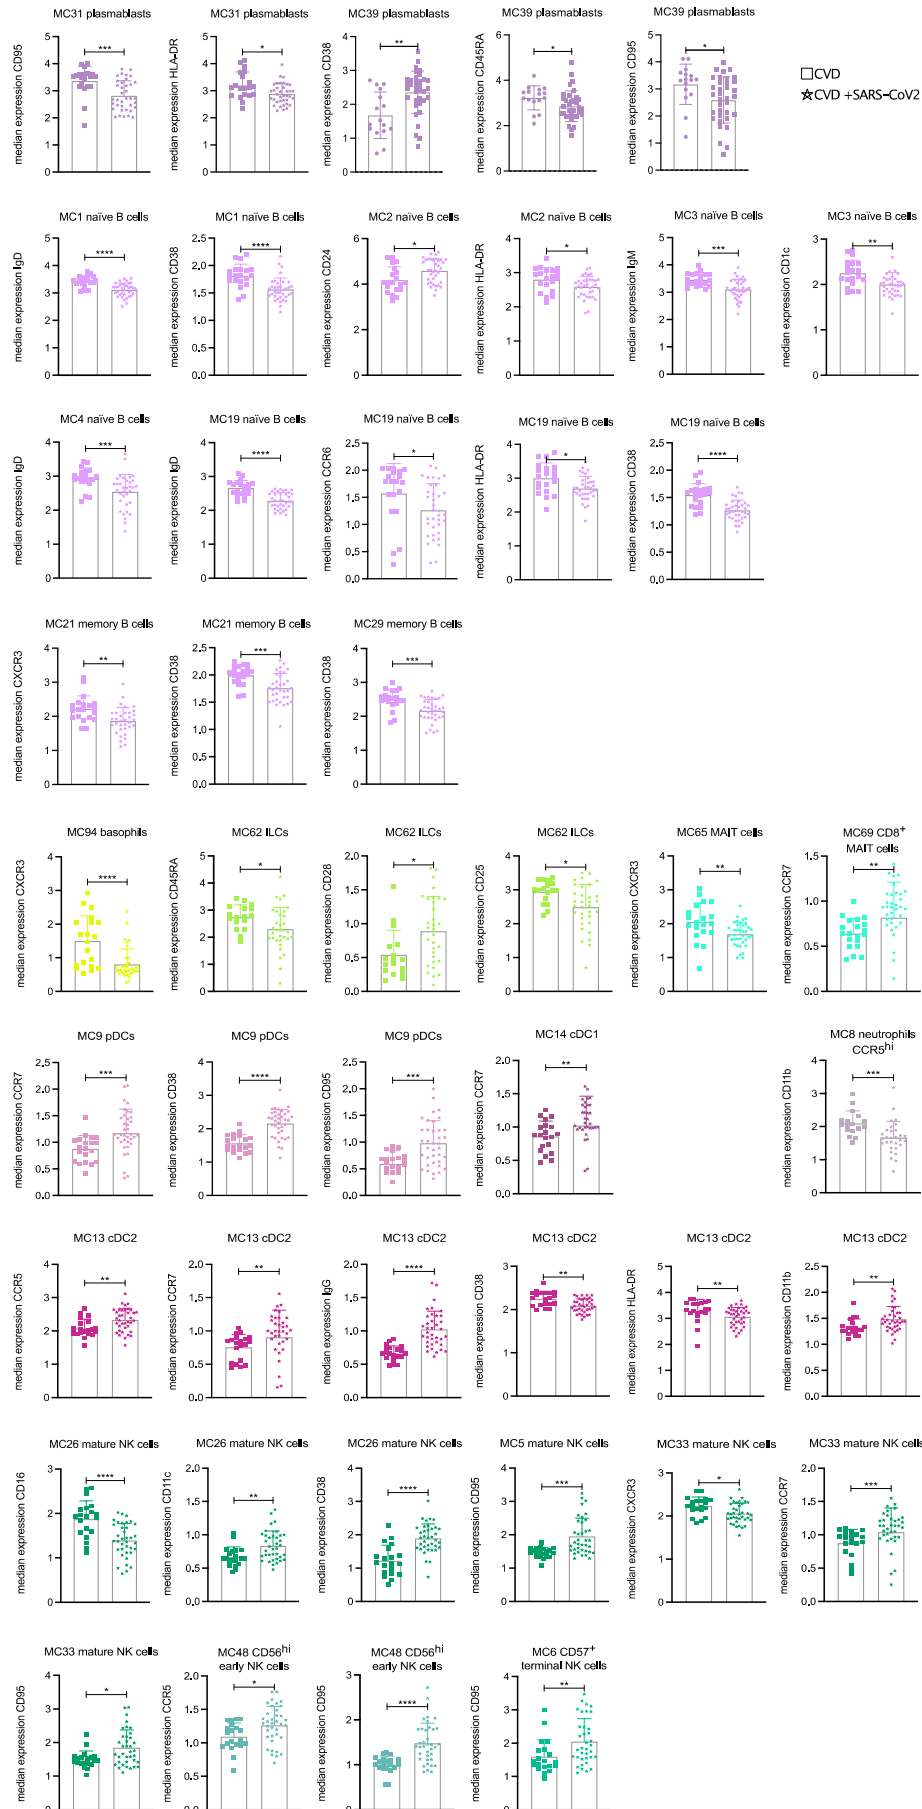

Supplement: Supplementary file 18 [file supplementary › 20231115 Gu╠ênter et al Supplement Figures_8.pdf]

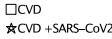

Supplement: Supplementary file 18 [file supplementary › 20231115 Gu╠ênter et al Supplement Figures_9.pdf]
